# Supplementary figures and images for: Inhibition of nuclear deacetylase Sirtuin-1 induces mitochondrial acetylation and calcium overload leading to cell death
Source: PubMed Central journal article supplement — Redox Biol. 2022 May 19;53:102334. doi: 10.1016/j.redox.2022.102334 (PMC9142701; doi:10.1016/j.redox.2022.102334), 2022-05-19

**A**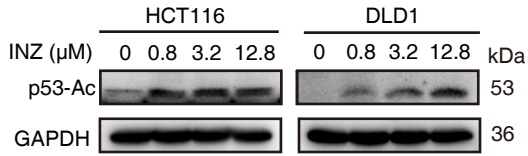**B**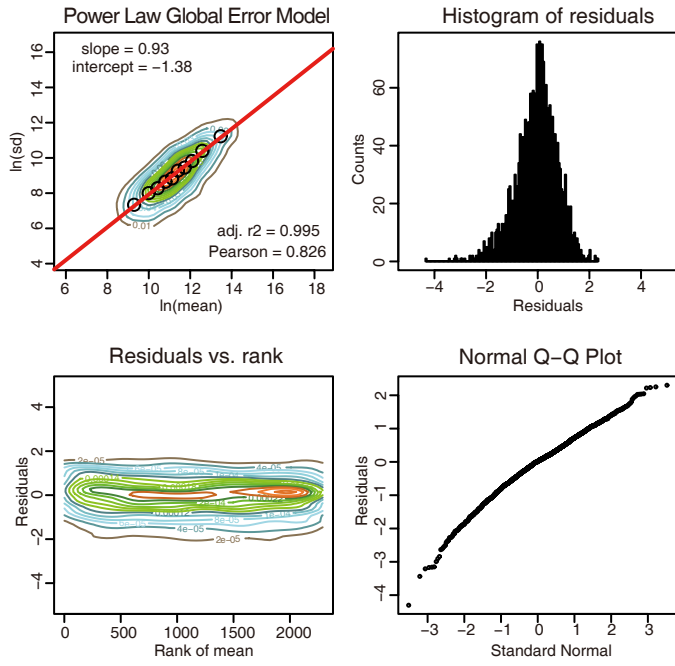**C**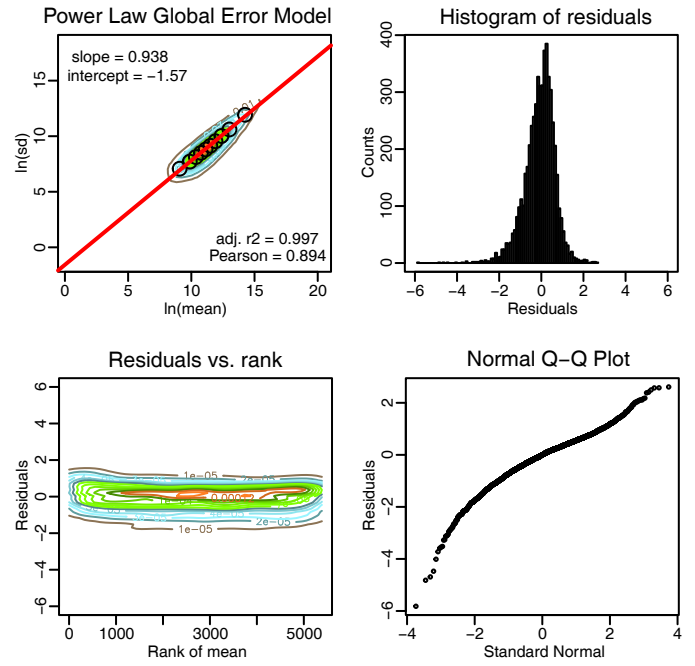**Figure S1**

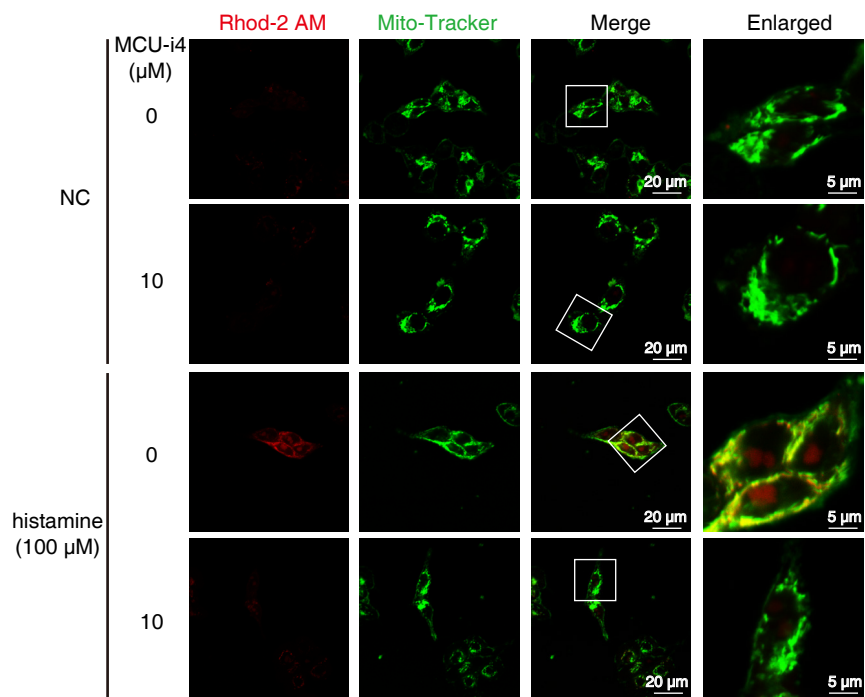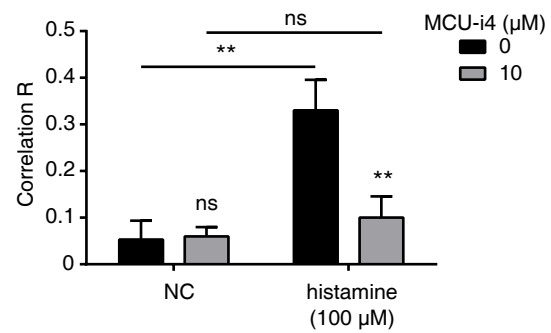

Figure S2

Supplement: mmc3.pdf [file mmc3.pdf]
